# Supplementary material
Source: PubMed Central journal article supplement (PMC2585061)
Supplement: NIHMS76443-supplement-Supplemental.pdf [file NIHMS76443-supplement-Supplemental.pdf]

**Supplemental Table 1.** PCR primers and conditions.

| Gene              | Exon                                                 | Primer Sequences 5' to 3';<br>Forward and Reverse Primers | Annealing<br>Temp | Amplimer Size<br>(nt) | Notes                                               |
|-------------------|------------------------------------------------------|-----------------------------------------------------------|-------------------|-----------------------|-----------------------------------------------------|
| <b>CA4 (RP17)</b> | 1                                                    | GGAGAGCGGAGGATTTTCAGATG –<br>TATCAGGGACTCCCAACTCG         | 56° C             | 555                   | nested sequencing;<br>HotStarTaq and Q-Solution*    |
|                   | 1 seq                                                | TGGAGAGGGGAGGGCAGGC –<br>AGTCCTCCCGCACCCCTCGC             | ---               | ---                   | sequencing primers                                  |
|                   | 2                                                    | TCCTCCTGTGTGTGTGAGC –<br>TCCATTTCCGGCTTGCGTGG             | 56° C             | 185                   |                                                     |
|                   | 3                                                    | TGAAGTTGTCCCTACCCCG –<br>GTGCTCTCTCCTCCTGGAAG             | 52° C             | 618                   |                                                     |
|                   | 4-5,7                                                | GAGCTCATGAAGGTTGGGAGGCAGG –<br>ACAGCTCAGGCTTTTCTTGC       | 64° C             | 1307                  | nested sequencing;<br>HotStarTaq without Q-Solution |
|                   | 4 seq-5 seq                                          | TTGGGAGGCAGGAGACAATG –<br>AGTCCCAGGTCTCTGAATCC            | ---               | ---                   | sequencing primers                                  |
|                   | 7s                                                   | TCTCCCACCCCTCACTGAC –<br>CTCCCCACCTGTATCCTG               | ---               | ---                   | sequencing primers                                  |
|                   | 6                                                    | TCCAACCTCCGCCTCTGTTTC –<br>CACCCACCCCTTCCTTTGTG           | 60° C             | 306                   |                                                     |
| <b>CRX</b>        | 8                                                    | GGTCACACGGCAGGGAGTG –<br>GGGACAGGGTGGGGTAGTTG             | 60° C             | 429                   |                                                     |
|                   | 1                                                    | CTGCACGTCACCCCATGGTGAGTAAC –<br>CAGAGGTCTCCAAGAGATGAGGCC  | 64° C             | 257                   |                                                     |
|                   | 2                                                    | GGATGGAATTCTTGGTCATCCCAG –<br>CTCTTTGTTCCGGGCAGGCCTC      | 64° C             | 314                   |                                                     |
|                   | 3a                                                   | GGATGCAAAGTAGACAGATG –<br>GGCGTAGGTCATGGCATAGGG           | 60° C             | 463                   |                                                     |
|                   | 3b                                                   | CCTCCACAGATGTGTGTCCAGAC –<br>TGGGAGAAAGGTAGGGGTCTAGG      | 64° C             | 294                   |                                                     |
| 3c                | GCCTCCGCTTTCTGCTCTTC –<br>GCCCGATGGAGAGAGATGGAGACTGC | 60° C                                                     | 340               |                       |                                                     |

|                      |       |                                                     |       |     |                               |
|----------------------|-------|-----------------------------------------------------|-------|-----|-------------------------------|
| <b>FSCN2</b>         | 1     | AGGGGGTTCGTGACGCC –<br>TCGGTGCCTCCGAAGA             | 60° C | 991 |                               |
|                      | 1 seq | TCCGCAGCAGCCACCT –<br>TCGGTGCCTCCGAAGAA             | ---   | --- | sequencing primers            |
|                      | 2     | GGTCTCTGAGAGGTGCCTTC –<br>ATGGGGATGATGGAGGAGG       | 60° C | 347 |                               |
|                      | 3     | GATTGCCGTAGCAGCTCAGT –<br>TCCAGCTCTTGGTGGAGATG      | 60° C | 399 |                               |
|                      | 4a    | CACATGAGGCAATGGCA –<br>CAGGTGCAAGACGTCGTAGA         | 60° C | 263 |                               |
|                      | 4b    | AACCAGCTGGACACCAA –<br>ACTCGAAGACGAAGTCCTCG         | 58° C | 245 |                               |
|                      | 5     | ACGTCTTCCACCTGAGCTTC –<br>GAGAGACACGGTTTTAATGCG     | 60° C | 381 |                               |
| <b>IMPDH1 (RP10)</b> | 1     | GGCGCGCGTCAGCAGTAGCAG –<br>TCGCCGTGCCACGTCCGTCTGCTC | 56° C | 373 |                               |
|                      | 2     | ACCCAGTAGACCTTTCGCT –<br>ATGCCCTGCCCTGAGCAAG        | 56° C | 364 |                               |
|                      | 3-4   | TGGGTGATAAACTCTTTACGTGG –<br>GCCTCTGAGGTGGGGACT     | 56° C | 399 |                               |
|                      | 5-6   | GCTTTCTTCCAGCCTTTTCCT –<br>AACAACGGGACTGTGGAC       | 56° C | 548 |                               |
|                      | 7     | AGTGAATCTCTGGAGTGGTC –<br>CCTGGGTCCCTATAAACCTC      | 56° C | 377 | nested sequencing             |
|                      | 7 seq | CATCTTCACCCTCCTAAACATC –<br>AACCTCCACTCTGCTGAACCAC  | ---   | --- | sequencing primers            |
|                      | 8-9   | TTCATCCACTCAGGCTCTCC –<br>CTGGGGAACAAAGGCGAGG       | 56° C | 561 |                               |
|                      | 10-11 | ACACTCATCCTGGTGGTATTTG –<br>CCATCTGGGGAAGTCGGTG     | 56° C | 644 |                               |
|                      | 12-13 | AAGAGGTGGGGTGGGGT –<br>ACCTGCCCAACCCACTGC           | 64° C | 438 | HotStarTaq without Q-Solution |

|                      |             |                                                         |       |     |                                    |
|----------------------|-------------|---------------------------------------------------------|-------|-----|------------------------------------|
|                      | 14          | GGGAAAGGGTTTTGGGAAG –<br>TGTGCCCAAAGTGGACAC             | 56° C | 154 |                                    |
| <b>NRL</b>           | 1           | CTCAGAGAGCTGGCCCTTTA -<br>AGAGGGGGTTCTAGGTGAGC          | 53° C | 217 |                                    |
|                      | 2           | CCATGTGCTCCAGACCTCTC –<br>CTCTCTTGGGCAGTCCTCCT          | 64° C | 504 |                                    |
|                      | 3           | GGGGATCCCAGAGACGAG –<br>AAGGCGCTCTGGTAACGAT             | 64° C | 727 |                                    |
|                      | 3 seq       | GCGGAGCCAGGTAGCGTC –<br>AAGGCGCTCTGGTAAGCAT             | ---   | --- | sequencing primers                 |
| <b>PRPF3 (RP18)</b>  | 11          | GCAAATGCTGAAGTGATTGG –<br>AAGGTACTTGCCCGAGGTTT          | 56° C | 317 |                                    |
| <b>PRPF8 (RP13)</b>  | 42          | CATCTTGCTGTGAACCGC –<br>TGGCTGGCTTGGAGGTGG              | 65° C | 499 | nested sequencing                  |
|                      | 42 seq      | TGGCTGGCTTGGAGGTGG –<br>ACAAGCCATCAGGAGGTC              | ---   | --- | sequencing primers                 |
| <b>PRPF31 (RP11)</b> | 2-3         | CTGGGGGAGAATCATCGCTC –<br>AAGGCTCTGGAAAAGGCT            | 56° C | 557 |                                    |
|                      | 4           | CGAGAGGGGGTAGGGATTTAGATAC –<br>ACCTCGATCTGAGCTTGGGCTTAG | 52° C | 252 |                                    |
|                      | 5           | ACAACCTCCTGTCCCGTTTACC –<br>GCACCCACCTTCTCTGCG          | 56° C | 148 |                                    |
|                      | 6-7         | CTTCCTGAGTTCCCGAGCC –<br>AGCTTTCCCAAGGTCACAGTG          | 56° C | 574 | nested sequencing due to CA repeat |
|                      | 6 seq-7 seq | TCCAGCCTAATCCCCAATC –<br>AACCGAGAGGGCTGGGGC             | ---   | --- | sequencing primers                 |
|                      | 8           | TACTCACCCCCACCTCTCTG –<br>CCCATTTGATAGGGGAGGAG          | 56° C | 467 | HotStarTaq without Q-Solution      |
|                      | 9           | AAAGCCCCCTTCCAGGACC –<br>GGTAGGACAGTGCTCGCTG            | 62° C | 315 |                                    |
|                      | 10-11       | AGGCAGCATTAGGTGCTGAT –<br>CAGCGCCCTAGACATGAG            | 64° C | 540 | HotStarTaq without Q-Solution      |

|             |        |                                                       |       |     |                               |
|-------------|--------|-------------------------------------------------------|-------|-----|-------------------------------|
|             | 12-13  | GGAGGGGGTGCCTCGGTGG –<br>TGCCAGGAGCTGTCTACGTC         | 62° C | 524 | HotStarTaq without Q-Solution |
|             | 14     | ACCCATCATCCTCTCTCCCTCAC –<br>CCAGAACCCGATCCTAGCC      | 56° C | 239 |                               |
| <b>RDS</b>  | 1a-1b  | AGCTGTGCTGTGGGAAGCAA –<br>CTTCAGCCAGGGCTTCCATC        | 62° C | 338 |                               |
|             | 1c-1d  | TGGACCCAGCCAAGTATGCC –<br>CTGACCCCAGGACTGGAAGC        | 62° C | 352 |                               |
|             | 2      | AAGCCCATCTCCAGCTGTCT –<br>TTACCCTTACCCCCAGCTGGCCCAG   | 62° C | 311 |                               |
|             | 3      | TGCCTCTAAATCTCCTCTCCCAC –<br>TGCACTATTTCTCAGTGTTCCGGG | 62° C | 286 |                               |
| <b>RHO</b>  | 1      | GTCAGCCACAAGGGCCACAG –<br>CACACCCACCCACACCC           | 62° C | 410 |                               |
|             | 2      | TGCACCCTCCTTAGGCAGTG –<br>TGACTGGAGGACCCTACAAAGA      | 62° C | 284 |                               |
|             | 3-4    | GTCTCCCTACCTGCCTGTCC –<br>TAGCTTGTCCTTGGCAGGCAGC      | 62° C | 613 |                               |
|             | 5      | CCCTGACTCAAGCCTCTTGC –<br>GTCGGCCACAGAGTCCTAGG        | 62° C | 164 |                               |
| <b>ROM1</b> | 1      | GGGGCTGACAGGGGGGCG –<br>GGATTCAAGGCAGCAGGAGG          | 64° C | 829 |                               |
|             | 1a seq | CTGACTCAGCATCCTGCC –<br>GGGGCAGGACAGGGAAGT            | ---   | --- | sequencing primers            |
|             | 1b seq | CCTGTCAGTTCCTGTCCCTGC –<br>GAGGAAGGGAGACGCAAATCAC     | ---   | --- | sequencing primers            |
|             | 2      | AGGCCTCTATCTCCAGACAT –<br>AGTCCCGGGTGGGAGGAGGT        | 61° C | 337 |                               |
|             | 3      | CAACCCTGGGCCTCTTGGAA –<br>GCCTTGGTAAGGAGTTGTGA        | 56° C | 353 |                               |
| <b>RP1</b>  | 4a     | TGGGGAAAACAAGTCTGAGT –<br>TGCTGGCAACAGATGACAAA        | 56° C | 539 |                               |

|                   |            |                                                            |          |      |                                                                                     |
|-------------------|------------|------------------------------------------------------------|----------|------|-------------------------------------------------------------------------------------|
|                   | 4b         | GCTCAGTGTGGTTTAAACAAAAC –<br>ACCGATTTCTCTTTTTTTAGGTG       | 54° C    | 441  |                                                                                     |
|                   | 4c         | ATTCCAAGGTTCAAGGAC –<br>CAATTTACCACACTCGTTTCATTTC          | 56° C    | 541  |                                                                                     |
|                   | 4d         | GCAGAACATAAATCCATATCCAAC –<br>ATCTACTTGAATGGCAGC           | 56° C    | 457  |                                                                                     |
| <b>RP9 (PAP1)</b> | 1          | GTTGCCCGAGCGGCGCT –<br>TGGCCGCGCGCGGACGGCA                 | 62° C    | 213  |                                                                                     |
|                   | 2          | AAATCTCTGATTA AAAATCCTATAGCC –<br>AAAAGGAGATTTAACATCATGCAA | 62° C    | 230  |                                                                                     |
|                   | 3          | CAGGAAAAGCCAGGCAAG –<br>GAGGGCTGTGATGAGAACAAG              | 56° C    | 320  |                                                                                     |
|                   | 4          | TGCTGATTCTTTATCTTGAGTAGGTG –<br>TGGTGACTTTCTGCTTCACTG      | 54° C    | 231  |                                                                                     |
|                   | 5          | GGTTTTTCATAACATAGGCATTTCA –<br>TGTTTACTGCACCATTCTCT        | 53° C    | 245  |                                                                                     |
|                   | 6          | CATCCTATACTGCTTTTGAATGACA –<br>TGCATCTTCTCTGTTCCCTG        | 64° C    | 357  | hybridizes to both orthologs                                                        |
|                   | 6 alt      | AGTAGGCATTCAGGTGGA –<br>TGCATCTTCTCTGTTCCCTG               | 64° C    | 432  | hybridizes to PAP1 only                                                             |
| <b>RPGR</b>       | ORF 15a    | CGGTATGGCAGGAAATTGATTGA –<br>CCATCCTCTGCTTCTCCAC           | 61° C    | 299  |                                                                                     |
|                   | ORF15b     | AGGAAGGAGCAGAGGATTCA –<br>CCTTCTCTGCTAGTTCCTTCTCTCCC       | 56° C    | 330  |                                                                                     |
|                   | ORF 15c    | GGGAGAAGGGGGAGAAAGACAAGG –<br>TTCCCTCCTCTACTT              | 56° C    | 448  | reverse direction only; 2 x 50 ul PCR reactions, gel purified                       |
|                   | ORF15d     | TGTCTGACTGGCCATAATCG –<br>TGTCTGACTGGCCATAATCG             | 60-58° C | 1630 | nested sequencing; 3 x 50 ul PCR reactions, gel purified; HotStarTaq and Q-Solution |
|                   | 15d nest 1 | GTTTGCCATATTTACAGATCC                                      | 58° C    | ---  | sequencing primers 1, one direction only                                            |
|                   | 15d nest 2 | GAAGTAGAGGGAGGGGAAGTAG                                     | 58° C    | ---  | sequencing primers 2, one direction only                                            |

|            |                                                 |       |     |                                          |
|------------|-------------------------------------------------|-------|-----|------------------------------------------|
| 15d nest 3 | TCCTTCCTCCTCTTCCCCCTCCC                         | 63° C | --- | sequencing primers 3, one direction only |
| ORF15e     | GCAGGATGGAGAGGAGTACA –<br>GAGAGAGGCCAAAATTTACCA | 56° C | 415 |                                          |

---

\*HotStarTaq (Qiagen) and Q-Solution (Qiagen)

**Supplemental Table 2.** Cohort family data

| Family ID | Ethnicity     | Mutation                            | Gen | Aff | M-M | Skip | Lods d:r | Lods d:x | Prior Publication |
|-----------|---------------|-------------------------------------|-----|-----|-----|------|----------|----------|-------------------|
| BCMAD013  | Caucasian     | RP1 Leu762fs/ter777 (2285_2289del)  | 3   | 5   | y   | 0    | 10       | 7        |                   |
| BCMAD014  | Caucasian     |                                     | 6   | 25  | y   | 2    | 40       | 9        |                   |
| BCMAD015  | Caucasian     |                                     | 5   | 9   | n   | 0    | 13       | 4        |                   |
| BCMAD032  | Caucasian     | RHO Pro23His (68 C>A)               | 4   | 4   | n   | 0    | 11       | 1        | 1                 |
| BCMAD033  | Caucasian     | RDS Tyr141Cys (422 A>G)             | 3   | 5   | n   | 0    | 11       | 4        | 1                 |
| BCMAD900  | Caucasian     |                                     | 6   | 18  | n   | 2    | 20       | -1       |                   |
| RFS001    | Caucasian     | RHO Pro23His (68 C>A)               | 4   | 6   | n   | 0    | 15       | 1        | 1                 |
| RFS003    | Caucasian     | RHO Asp190Asn (568 G>A)             | 3   | 6   | n   | 0    | 10       | 3        | 1                 |
| RFS004    | Caucasian     | RHO Leu46Arg (137 T>G)              | 3   | 4   | n   | 0    | 11       | 1        | 1,2               |
| RFS009    | Caucasian     |                                     | 4   | 6   | n   | 0    | 13       | 4        |                   |
| RFS010    | Caucasian     | RHO Pro23His (68 C>A)               | 5   | 14  | y   | 0    | 21       | 5        | 1                 |
| RFS012    | Caucasian     | RHO IVS4/exon5junction (IVS4-1 G>A) | 4   | 10  | y   | 0    | 11       | 9        |                   |
| RFS015    | Caucasian     | IMPDH1 Asp226Asn (676 G>A)          | 6   | 29  | y   | 0    | 50       | 20       | 3                 |
| RFS016    | African Amer. |                                     | 5   | 9   | y   | 1    | 14       | 1        |                   |
| RFS019    | Caucasian     | PRPF8 Glu2331fs/ter2358 (6991delG)  | 3   | 5   | y   | 0    | 11       | 8        |                   |
| RFS020    | Caucasian     | RHO Pro23His (68 C>A)               | 5   | 15  | y   | 0    | 16       | 7        |                   |
| RFS021    | Caucasian     |                                     | 4   | 10  | n   | 1    | 14       | -1       |                   |
| RFS023    | Caucasian     | RHO Pro23His (68 C>A)               | 4   | 10  | n   | 0    | 20       | 4        | 1                 |
| RFS024    | Caucasian     | PRPF31 Cys299Arg (895 T>C)          | 4   | 13  | y   | 0    | 11       | 9        |                   |
| RFS025    | Caucasian     | RHO Pro23His (68 C>A)               | 3   | 3   | y   | 0    | 10       | 5        | 1                 |
| RFS026    | Caucasian     |                                     | 3   | 2   | n   | 1    | 6        | 2        |                   |
| RFS027    | Caucasian     | RDS exon2/IVS2junction (IVS2+3 A>T) | 6   | 40  | y   | 0    | 23       | 8        | 1                 |
| RFS029    | Caucasian     |                                     | 3   | 5   | n   | 0    | 10       | 3        |                   |
| RFS030    | Caucasian     | PRPF8 Arg2310Gly (6928 A>G)         | 4   | 4   | n   | 0    | 14       | 2        |                   |
| RFS031    | Caucasian     | PRPF8 Glu2331fs/ter2358 (6991delG)  | 5   | 33  | y   | 0    | 86       | 53       |                   |
| RFS033    | Caucasian     | PRPF31 Gln74ter (220 C>T)           | 3   | 2   | n   | 1    | 5        | 0        |                   |
| RFS034    | Caucasian     |                                     | 4   | 10  | y   | 0    | 34       | 14       |                   |
| RFS035    | Caucasian     |                                     | 3   | 4   | y   | 0    | 6        | 4        |                   |
| RFS036    | Caucasian     | RHO Cys110Phe (329 G>T)             | 3   | 4   | n   | 0    | 11       | 3        | 1                 |
| RFS037    | Caucasian     | RHO Pro23His (68 C>A)               | 3   | 4   | y   | 0    | 11       | 5        | 1                 |
| RFS038    | Caucasian     |                                     | 4   | 8   | y   | 0    | 8        | 4        |                   |
| RFS046    | Caucasian     |                                     | 2   | 2   | y   | 0    | 7        | 4        |                   |
| RFS048    | Caucasian     |                                     | 4   | 6   | n   | 0    | 15       | 0        |                   |

|        |               |                                           |   |    |   |   |    |    |     |
|--------|---------------|-------------------------------------------|---|----|---|---|----|----|-----|
| RFS049 | Caucasian     | RHO Pro171Ser (511 C>T)                   | 2 | 2  | y | 0 | 7  | 5  | 1   |
| RFS053 | Caucasian     | PRPF8 Phe2304Leu (6912 C>G)               | 2 | 2  | n | 0 | 7  | 2  |     |
| RFS061 | unknown       |                                           | 3 | 5  | y | 0 | 11 | 5  |     |
| RFS066 | Caucasian     |                                           | 5 | 15 | y | 0 | 21 | 8  |     |
| RFS069 | Caucasian     | RHO Pro23His (68 C>A)                     | 4 | 7  | y | 0 | 12 | 4  | 1   |
| RFS070 | Caucasian     | RDS Pro216Leu (647 C>T)                   | 2 | 6  | n | 0 | 9  | 2  | 1   |
| RFS071 | unknown       | RHO Pro23His (68 C>A)                     | 2 | 3  | y | 0 | 23 | 12 | 1   |
| RFS072 | Hispanic      | RHO Gly106Arg (318 A>G)                   | 3 | 15 | y | 0 | 7  | 6  | 1   |
| RFS073 | Caucasian     |                                           | 3 | 4  | y | 0 | 11 | 4  |     |
| RFS076 | Caucasian     |                                           | 2 | 4  | n | 1 | 2  | 1  |     |
| RFS078 | Caucasian     | PRPF31 Asn131fs/ter197 (390delC)          | 2 | 3  | y | 0 | 7  | 4  |     |
| RFS079 | Caucasian     | RDS Pro210Arg (629 C>G)                   | 3 | 6  | n | 0 | 10 | 1  | 1   |
| RFS083 | Caucasian     | RDS exon2/IVS2junction (IVS2+3 A>T)       | 5 | 9  | y | 0 | 9  | 3  | 1   |
| RFS084 | Caucasian     | PRPF3 Pro493Ser (1477 C>T)                | 3 | 5  | n | 0 | 11 | 3  |     |
| RFS085 | African Amer. | PRPF8 Ala2328Val (6983 C>T)               | 3 | 3  | n | 0 | 10 | 3  |     |
| RFS087 | Caucasian     | CRX Arg41Gln (122 G>A)                    | 4 | 4  | y | 0 | 14 | 5  | 1,4 |
| RFS092 | Caucasian     |                                           | 4 | 10 | y | 2 | 14 | 8  |     |
| RFS094 | Hispanic      |                                           | 5 | 4  | n | 1 | 5  | -1 |     |
| RFS096 | Caucasian     | RHO Arg135Trp (403 C>T)                   | 3 | 6  | y | 0 | 14 | 5  | 1   |
| RFS097 | Caucasian     |                                           | 3 | 4  | y | 0 | 7  | 4  |     |
| RFS099 | Caucasian     |                                           | 4 | 6  | n | 0 | 7  | 0  |     |
| RFS101 | Caucasian     | PRPF31 exon10/IVS10junction (IVS10+1 G>A) | 4 | 7  | n | 0 | 13 | 4  |     |
| RFS118 | Caucasian     | RDS Arg172Gln (516 G>T)                   | 4 | 7  | n | 0 | 14 | 4  |     |
| RFS119 | Caucasian     |                                           | 4 | 4  | n | 5 | 3  | -7 |     |
| RFS132 | African Amer. |                                           | 6 | 13 | y | 0 | 35 | 10 |     |
| RFS136 | Caucasian     | RHO Pro23His (68 C>A)                     | 5 | 12 | n | 0 | 18 | 6  | 1   |
| RFS137 | Caucasian     | RP1 Arg677ter (2029 C>T)                  | 6 | 22 | y | 0 | 23 | 18 | 1,5 |
| RFS138 | Hispanic      |                                           | 4 | 14 | y | 0 | 15 | 12 |     |
| RFS146 | Caucasian     |                                           | 4 | 10 | y | 0 | 8  | 7  |     |
| RFS153 | Caucasian     | RHO Pro170Arg (509 C>G)                   | 3 | 7  | n | 0 | 9  | 3  | 1   |
| RFS156 | unknown       | RDS exon2/IVS2junction (IVS2+3 A>T)       | 3 | 5  | y | 0 | 12 | 6  | 1   |
| RFS163 | African Amer. | RHO Ala164Val (491 C>T)                   | 3 | 6  | n | 0 | 9  | 2  | 1   |
| RFS164 | Caucasian     |                                           | 2 | 4  | y | 0 | 8  | 4  |     |
| RFS169 | Caucasian     |                                           | 5 | 13 | y | 0 | 18 | 6  |     |
| RFS170 | Caucasian     |                                           | 3 | 12 | y | 0 | 9  | 3  |     |
| RFS173 | Caucasian     | RHO Gly106Trp (316 G>T)                   | 4 | 7  | n | 1 | 10 | 1  |     |



|         |               |                                           |   |      |   |   |     |    |       |
|---------|---------------|-------------------------------------------|---|------|---|---|-----|----|-------|
| RFS175  | Caucasian     |                                           | 3 | 3    | n | 0 | 10  | 2  |       |
| RFS178  | Caucasian     |                                           | 4 | 12   | y | 2 | 17  | -1 |       |
| RFS179  | Caucasian     |                                           | 3 | 3    | n | 0 | 11  | 1  |       |
| RFS182  | Caucasian     | RHO Thr58Arg (173 C>G)                    | 4 | 7    | y | 0 | 14  | 6  |       |
| RFS183  | Caucasian     |                                           | 3 | 2    | y | 1 | 5   | 3  |       |
| RFS184  | Caucasian     | RDS Pro216Leu (647 C>T)                   | 3 | 3    | n | 0 | 5   | -1 |       |
| RFS191  | Caucasian     |                                           | 3 | 7    | n | 0 | 11  | 0  |       |
| RFS202  | Caucasian     | PRPF8 IVS41/exon42junction (IVS41-4 G>A)  | 3 | 3    | y | 0 | 11  | 3  |       |
| RFS204  | Caucasian     | RHO Pro23His (68 C>A)                     | 4 | 19   | y | 0 | 27  | 5  |       |
| RFS207  | Caucasian     | PRPF31 Gly253fs/ter317 (758_767del)       | 4 | 5    | y | 0 | 13  | 7  |       |
| RFS222  | Caucasian     |                                           | 3 | 5    | y | 0 | 6   | 3  |       |
| RFS268  | Caucasian     |                                           | 4 | 13   | y | 0 | 23  | 7  |       |
| RFS275  | Caucasian     | RDS exon2/IVS2junction (IVS2+3 A>T)       | 3 | 5    | n | 0 | 15  | 4  |       |
| RFS900  | Caucasian     | CRX Leu146_Pro149del (436_447del)         | 6 | 12   | y | 0 | 56  | 17 | 1, 4  |
| RFS910  | Caucasian     |                                           | 4 | 9    | y | 0 | 15  | 8  |       |
| RP01    | Caucasian     | RP1 Arg677ter (2029 C>T)                  | 8 | 200+ | y | 2 | 206 | 78 | 1,5,6 |
| RP01B   | Caucasian     | RHO Arg135Leu (404 G>T + 405 G>T)         | 5 | 29   | y | 0 | 21  | 8  |       |
| UTAD002 | Caucasian     |                                           | 3 | 3    | n | 0 | 11  | -1 |       |
| UTAD003 | Caucasian     |                                           | 6 | 17   | y | 0 | 44  | 18 |       |
| UTAD005 | Caucasian     | RPGR Glu256fs/ter492 (ORF15 + 764_765del) | 4 | 6    | n | 2 | 17  | 3  |       |
| UTAD007 | Hispanic      |                                           | 3 | 6    | n | 0 | 10  | 2  |       |
| UTAD008 | unknown       |                                           | 3 | 4    | n | 0 | 11  | 2  |       |
| UTAD010 | Caucasian     | RHO Pro23His (68 C>A)                     | 3 | 3    | n | 0 | 11  | 1  | 1     |
| UTAD013 | Caucasian     | RHO Gly106Trp (316 G>T)                   | 3 | 5    | y | 0 | 13  | 5  | 1     |
| UTAD017 | Caucasian     |                                           | 3 | 4    | n | 0 | 9   | 0  |       |
| UTAD018 | unknown       | RHO Pro23His (68 C>A)                     | 5 | 7    | y | 1 | 16  | 14 | 1     |
| UTAD022 | Caucasian     | RHO His211Arg (632 A>G)                   | 4 | 4    | n | 1 | 8   | 0  |       |
| UTAD023 | Caucasian     | RDS Val206_Val209del (616_627del)         | 3 | 5    | y | 0 | 14  | 8  | 1     |
| UTAD028 | Caucasian     |                                           | 4 | 4    | n | 0 | 14  | 2  |       |
| UTAD029 | Caucasian     | RP1 Leu762fs/ter777 (2285_2289del)        | 3 | 4    | y | 0 | 7   | 4  | 1, 5  |
| UTAD030 | unknown       | IMPDH1 Asp226Asn (676 G>A)                | 5 | 10   | n | 0 | 14  | 3  | 7     |
| UTAD034 | unknown       |                                           | 2 | 3    | y | 0 | 6   | 3  |       |
| UTAD035 | African Amer. |                                           | 4 | 12   | y | 0 | 24  | 20 |       |
| UTAD036 | Caucasian     |                                           | 5 | 10   | n | 2 | 26  | 1  |       |
| UTAD039 | Caucasian     | RP1 Leu762fs/ter777 (2285_2289del)        | 5 | 15   | y | 0 | 26  | 10 | 1, 5  |
| UTAD040 | Caucasian     |                                           | 3 | 2    | n | 1 | 5   | -1 |       |

|         |               |                                                            |   |    |   |   |    |    |     |
|---------|---------------|------------------------------------------------------------|---|----|---|---|----|----|-----|
| UTAD042 | unknown       | RHO Ser270Arg (810 C>A)                                    | 3 | 3  | n | 0 | 11 | 2  | 1   |
| UTAD045 | unknown       | IMPDH1 Asp226Asn (676 G>A)                                 | 6 | 38 | y | 0 | 40 | 15 | 3,8 |
| UTAD049 | Caucasian     |                                                            | 3 | 6  | y | 0 | 7  | 4  |     |
| UTAD055 | Caucasian     |                                                            | 5 | 10 | y | 2 | 17 | 6  |     |
| UTAD056 | Caucasian     | RDS Gly266Asp (797 G>A)                                    | 5 | 13 | y | 1 | 22 | 6  | 1   |
| UTAD058 | other         | RDS Gly266Asp (797 G>A)                                    | 3 | 5  | y | 0 | 14 | 12 | 1   |
| UTAD069 | Caucasian     |                                                            | 4 | 4  | n | 0 | 14 | 3  |     |
| UTAD070 | Caucasian     | RHO Leu57Arg (170 C>T)                                     | 4 | 5  | n | 0 | 9  | 1  | 1   |
| UTAD075 | Caucasian     |                                                            | 4 | 4  | y | 1 | 8  | 8  |     |
| UTAD076 | Caucasian     |                                                            | 4 | 18 | n | 1 | 24 | 0  |     |
| UTAD079 | Caucasian     | PRPF31 exon10/IVS10junction<br>(1049_IVS10+20del/insCCCCT) | 4 | 5  | n | 1 | 6  | -1 |     |
| UTAD080 | Hispanic      |                                                            | 4 | 8  | y | 0 | 13 | 7  |     |
| UTAD081 | Caucasian     | RHO Pro347Thr 1039 C>A                                     | 3 | 10 | y | 0 | 15 | 6  | 1   |
| UTAD082 | Caucasian     |                                                            | 4 | 9  | n | 1 | 7  | 3  |     |
| UTAD084 | Caucasian     | RHO Pro23His (68 C>A)                                      | 5 | 12 | y | 0 | 20 | 7  | 1   |
| UTAD085 | Caucasian     | RHO Pro23His (68 C>A)                                      | 4 | 5  | y | 1 | 12 | -3 | 1   |
| UTAD088 | Caucasian     | RDS Pro210Leu (629 C>T)                                    | 3 | 3  | y | 0 | 10 | 5  | 1   |
| UTAD089 | other         | RHO Glu181Lys (541 G>A)                                    | 5 | 17 | y | 0 | 26 | 12 | 1   |
| UTAD094 | Caucasian     |                                                            | 3 | 4  | n | 0 | 6  | 0  |     |
| UTAD095 | Asian         | RDS Pro216Ser (646 C>T)                                    | 4 | 20 | y | 0 | 31 | 15 | 1   |
| UTAD096 | African Amer. | RHO Pro171Gln (512 C>A)                                    | 4 | 6  | n | 0 | 14 | 3  | 1   |
| UTAD099 | Caucasian     |                                                            | 5 | 6  | n | 0 | 11 | 0  |     |
| UTAD102 | Hispanic      |                                                            | 3 | 4  | y | 0 | 11 | 8  |     |
| UTAD117 | Caucasian     |                                                            | 5 | 4  | n | 2 | 11 | 2  |     |
| UTAD119 | Caucasian     |                                                            | 6 | 12 | n | 2 | 24 | 5  |     |
| UTAD120 | unknown       | RHO Arg135Trp (403 C>T)                                    | 5 | 25 | y | 0 | 25 | 14 | 1   |
| UTAD140 | Caucasian     | RHO Pro347Leu (1040 C>T)                                   | 3 | 6  | ? | ? | 15 | 5  | 1   |
| UTAD147 | Caucasian     |                                                            | 5 | 8  | n | 2 | 5  | 1  |     |
| UTAD159 | unknown       | RHO Arg135Trp (403 C>T)                                    | 4 | 5  | n | 0 | 11 | 4  | 1   |
| UTAD168 | Caucasian     |                                                            | 3 | 3  | n | 0 | 10 | 2  |     |
| UTAD170 | unknown       |                                                            | 4 | 7  | n | 0 | 14 | 2  |     |
| UTAD177 | Caucasian     | IMPDH1 Asp226Asn (676 G>A)                                 | 3 | 11 | y | 0 | 11 | 8  | 3,7 |
| UTAD178 | Hispanic      |                                                            | 5 | 19 | n | 0 | 10 | 6  |     |
| UTAD181 | Hispanic      |                                                            | 3 | 5  | n | 1 | 13 | 1  |     |
| UTAD184 | Caucasian     | PRPF31 Glu325ter (973 G>T)                                 | 4 | 3  | n | 1 | 9  | 4  |     |
| UTAD188 | Caucasian     | RHO Pro347Leu (1040 C>T)                                   | 3 | 7  | n | 0 | 11 | 6  | 1   |

|          |           |                                                             |   |    |   |   |    |    |              |
|----------|-----------|-------------------------------------------------------------|---|----|---|---|----|----|--------------|
| UTAD198  | Hispanic  |                                                             | 3 | 5  | y | 0 | 11 | 8  |              |
| UTAD2006 | Caucasian |                                                             | 5 | 12 | y | 3 | 31 | 5  |              |
| UTAD201  | Hispanic  |                                                             | 4 | 10 | n | 0 | 11 | 4  |              |
| UTAD215  | Caucasian | RDS Leu185Pro (554 T>C) +<br>ROM1 Leu114fs/ter131 (339insG) | 4 | 12 | y | 0 | 21 | 6  | 1            |
| UTAD230  | unknown   | RHO Pro23His (68 C>A)                                       | 3 | 3  | n | 0 | 11 | 2  | 1            |
| UTAD242  | unknown   |                                                             | 3 | 3  | n | 1 | 8  | -1 |              |
| UTAD246  | Asian     |                                                             | 3 | 2  | n | 1 | 3  | 0  |              |
| UTAD247  | Hispanic  |                                                             | 4 | 7  | n | 1 | 10 | -1 |              |
| UTAD259  | unknown   |                                                             | 3 | 2  | n | 1 | 6  | 0  |              |
| UTAD280  | Caucasian | RDS Leu126Arg (377 T>G)                                     | 5 | 9  | y | 2 | 22 | 7  | 1            |
| UTAD305  | Caucasian |                                                             | 4 | 15 | n | 1 | 12 | 6  |              |
| UTAD352  | Caucasian |                                                             | 2 | 2  | y | 0 | 6  | 3  |              |
| UTAD388  | Asian     |                                                             | 4 | 21 | y | 0 | 26 | 11 |              |
| UTAD392  | Caucasian |                                                             | 4 | 9  | y | 0 | 22 | 13 |              |
| UTAD395  | Caucasian | RHO Arg135Leu (404 G>T + 405 G>T)                           | 3 | 5  | y | 0 | 11 | 6  |              |
| UTAD399  | unknown   | RDS Arg46ter (136 C>T)                                      | 2 | 4  | y | 0 | 5  | 4  | 1            |
| UTAD401  | other     | PRPF31 exon2/IVS2junction (IVS2+1 G>A)                      | 4 | 12 | y | 2 | 19 | 15 |              |
| UTAD404  | Caucasian |                                                             | 4 | 10 | n | 0 | 17 | 8  |              |
| UTAD407  | unknown   | RHO Pro347Ala (1039 C>G)                                    | 6 | 33 | y | 1 | 41 | 21 | 1            |
| UTAD410  | Caucasian | PRPF3 Thr494Met (1481 C>T)                                  | 4 | 10 | y | 0 | 14 | 9  |              |
| UTAD414  | unknown   | RHO Pro23His (68 C>A)                                       | 2 | 4  | y | 0 | 8  | 5  | 1            |
| UTAD437  | Caucasian | RHO Pro23His (68 C>A)                                       | 5 | 4  | n | 1 | 12 | 2  | 1            |
| UTAD441  | Caucasian | RP1 Gly723ter 2167 G>T                                      | 3 | 6  | y | 2 | 17 | 10 | 1 (UTAD411)* |
| UTAD442  | unknown   | RPGR Arg195fs/ter229 (ORF15 + 558del)                       | 5 | 18 | n | 0 | 38 | 5  |              |
| UTAD449  | Hispanic  |                                                             | 8 | 3  | y | 0 | 8  | 5  |              |
| UTAD472  | Caucasian |                                                             | 5 | 13 | n | 0 | 21 | 7  |              |
| UTAD476  | unknown   |                                                             | 5 | 7  | y | 0 | 17 | 6  |              |
| UTAD479  | Caucasian | PRPF31 Ala291Pro (871 G>C)                                  | 4 | 10 | y | 0 | 14 | 2  |              |
| UTAD481  | Caucasian | PRPF31 Glu141ter (421 G>T)                                  | 3 | 6  | y | 0 | 9  | 7  |              |
| UTAD482  | unknown   |                                                             | 5 | 5  | n | 0 | 16 | 4  |              |
| UTAD483  | Caucasian | RHO Cys187Tyr (560 G > A)                                   | 2 | 4  | y | 0 | 6  | 5  |              |
| UTAD488  | Caucasian |                                                             | 5 | 13 | n | 0 | 21 | 1  |              |
| UTAD493  | Caucasian | RHO Arg135Trp (403 C>T)                                     | 3 | 4  | y | 0 | 11 | 5  |              |
| UTAD497  | Caucasian | RHO Val345Met (1033 G>A)                                    | 5 | 20 | n | 0 | 35 | 10 |              |
| UTAD498  | Caucasian |                                                             | 3 | 3  | n | 0 | 10 | 1  |              |
| UTAD503  | Caucasian | PRPF31 Met212fs/ter238 (636delG)                            | 3 | 5  | y | 1 | 14 | 12 |              |

|         |                 |                                   |   |    |   |   |    |    |   |
|---------|-----------------|-----------------------------------|---|----|---|---|----|----|---|
| UTAD506 | Hispanic        |                                   | 3 | 6  | y | 0 | 7  | 4  |   |
| UTAD513 | Hispanic        | RHO Thr17Met (50 C>T)             | 3 | 4  | y | 0 | 11 | 9  |   |
| UTAD514 | Caucasian       |                                   | 3 | 4  | n | 0 | 10 | 3  |   |
| UTAD519 | Asian           | RDS Ser198Arg (594 C>G)           | 3 | 7  | y | 0 | 9  | 4  |   |
| UTAD522 | Caucasian       |                                   | 4 | 4  | y | 2 | 9  | 5  |   |
| UTAD526 | Caucasian       | RP1 Arg677ter (2029 C>T)          | 3 | 4  | n | 0 | 10 | 1  |   |
| UTAD529 | Caucasian       | RHO ter349Gln (1045 T>C)          | 4 | 10 | y | 0 | 15 | 11 |   |
| UTAD530 | Caucasian       |                                   | 6 | 18 | n | 0 | 30 | 10 |   |
| UTAD531 | unknown         | RHO Asp190Asn (568 G>A)           | 4 | 5  | n | 0 | 13 | 4  |   |
| UTAD533 | Caucasian       | RHO Pro23His (68 C>A)             | 4 | 6  | y | 0 | 10 | 7  |   |
| UTAD537 | Caucasian       |                                   | 4 | 4  | n | 1 | 9  | 3  |   |
| UTAD541 | Asian           | RDS Pro216Arg (647 C>G)           | 4 | 7  | y | 0 | 17 | 12 |   |
| UTAD543 | Asian           |                                   | 5 | 8  | n | 0 | 17 | 5  |   |
| UTAD544 | Asian           |                                   | 3 | 3  | n | 0 | 11 | 1  |   |
| UTAD545 | unknown         | RHO Pro267Leu (800 C>T)           | 3 | 8  | n | 0 | 17 | 5  |   |
| UTAD549 | Caucasian       |                                   | 4 | 5  | y | 0 | 11 | 5  |   |
| UTAD551 | Caucasian       |                                   | 4 | 3  | y | 1 | 9  | 3  |   |
| UTAD553 | Caucasian       | RHO Arg135Leu (404 G>T + 405 G>T) | 5 | 8  | y | 0 | 13 | 5  |   |
| UTAD554 | Caucasian       | RHO Pro23His (68 C>A)             | 3 | 7  | y | 0 | 14 | 6  |   |
| UTAD555 | African Carrib. |                                   | 4 | 8  | n | 1 | 13 | -2 |   |
| UTAD557 | Caucasian       | IMPDH1 Asp226Asn (676 G>A)        | 4 | 12 | y | 0 | 19 | 15 | 7 |
| UTAD562 | Caucasian       |                                   | 5 | 13 | y | 2 | 24 | 8  |   |
| UTAD565 | Caucasian       |                                   | 4 | 8  | y | 1 | 21 | 3  |   |

\*Incorrectly listed as UTAD411 in Sohocki 2001

## Supplemental Table 2 - References

1. Sohocki MM, Daiger SP, Bowne SJ, Rodriguez JA, Northrup H, Heckenlively JR, Birch DG, Mintz-Hittner H, Ruiz RS, Lewis RA, Saperstein DA, Sullivan LS. Prevalence of mutations causing retinitis pigmentosa and other inherited retinopathies. *Hum. Mutat.* 2001;17:42-51.
2. Rodriguez JA, Herrera CA, Birch DG, Daiger SP. A leucine to arginine amino acid substitution at codon 46 of rhodopsin is responsible for a severe form of autosomal dominant retinitis pigmentosa. *Hum. Mutat.* 1993;2:205-213.
3. Bowne SJ, Sullivan LS, Blanton SH, Cepko CL, Blackshaw S, Birch DG, Hughbanks-Wheaton D, Heckenlively JR, Daiger SP. Mutations in the inosine monophosphate dehydrogenase 1 gene (IMPDH1) cause the RP10 form of autosomal dominant retinitis pigmentosa. *Hum. Mol. Genet.* 2002;11:559-568.
4. Sohocki MM, Sullivan LS, Mintz-Hittner HA, Birch D, Heckenlively JR, Freund CL, McInnes RR, Daiger SP. A range of clinical phenotypes associated with mutations in CRX, a photoreceptor transcription-factor gene. *Am. J. Hum. Genet.* 1998;63:1307-1315.
5. Bowne SJ, Daiger SP, Hims MM, Sohocki MM, Malone KA, McKie AB, Heckenlively JR, Birch DG, Inglehearn CF, Bhattacharya SS, Bird A, Sullivan LS. Mutations in the RP1 gene causing autosomal dominant retinitis pigmentosa. *Hum. Mol. Genet.* 1999;8:2121-2128.
6. Sullivan LS, Heckenlively JR, Bowne SJ, Zuo J, Hide WA, Gal A, Denton M, Inglehearn CF, Blanton SH, Daiger SP. Mutations in a novel retina-specific gene cause autosomal dominant retinitis pigmentosa. *Nat. Genet.* 1999;22:255-259.
7. Bowne SJ, Sullivan LS, Mortimer SE, Hedstrom L, Zhu J, Spellicy CJ, Gire AI, Hughbanks-Wheaton D, Birch DG, Lewis RA, Heckenlively JR, Daiger SP. Spectrum and frequency of mutations in IMPDH1 associated with autosomal dominant retinitis pigmentosa and leber congenital amaurosis. *Invest. Ophthalmol. Vis. Sci.* 2006;47:34-42.
8. Kozma P, Hughbanks-Wheaton DK, Locke KG, Fish GE, Gire AI, Spellicy CJ, Sullivan LS, Bowne SJ, Daiger SP, Birch DG. Phenotypic characterization of a large family with RP10 autosomal-dominant retinitis pigmentosa: an Asp226Asn mutation in the IMPDH1 gene. *Am. J. Ophthalmol.* 2005;140:858-867.
